# Supplementary material for: An energy-blocking nanoparticle decorated with anti-VEGF antibody to reverse chemotherapeutic drug resistance
Source: PubMed Central journal article supplement — RSC Adv. 2019 Apr 16;9(21):12110–23. doi: 10.1039/c9ra01356c (PMC9087936; doi:10.1039/c9ra01356c), 2019-04-16
Supplement: RA-009-C9RA01356C-s001.pdf [file RA-009-C9RA01356C-s001.pdf]

## **An energy-blocking nanoparticle decorated with anti-VEGF antibody to reverse chemotherapeutic drug resistance**

Liu-Qing Gu<sup>a,1</sup>, Peng-Fei Cui<sup>a,1</sup>, Lei Xing<sup>a,b,c,d</sup>, Yu-Jing He<sup>a</sup>, Xin Chang<sup>a</sup>, Tian-Jiao Zhou<sup>a</sup>, Yu  
Liu<sup>e,\*</sup>, Ling Li<sup>f,\*</sup>, Hu-Lin Jiang<sup>a,b,c,d,\*</sup>

<sup>a</sup> State Key Laboratory of Natural Medicines, Department of Pharmaceutics, China Pharmaceutical  
University, Nanjing 210009, China

<sup>b</sup> Jiangsu Key Laboratory of Druggability of Biopharmaceuticals, China Pharmaceutical University,  
Nanjing 210009, China

<sup>c</sup> Jiangsu Key Laboratory of Drug Screening, China Pharmaceutical University, Nanjing 210009,  
China

<sup>d</sup> Jiangsu Key Laboratory of Drug Discovery for Metabolic Diseases, China Pharmaceutical  
University, Nanjing 210009, China

<sup>e</sup> Department of Biochemistry, School of Life Science and  
Technology, China Pharmaceutical University, Nanjing 210009, China

<sup>f</sup> Department of Endocrinology, Zhongda Hospital, Southeast University, Nanjing 210009, China

Professor Hu-Lin Jiang, State Key Laboratory of Natural Medicines, Department of Pharmaceutics,  
China Pharmaceutical University, Nanjing 210009, China.

Tel: +86-25-83271027; Fax: +86-25-83271027; E-mail: jianghulin3@163.com

Professor Ling Li, Department of Endocrinology, Zhongda Hospital, Southeast University, Nanjing  
210009, China.

Tel: +86-25-83272012; fax: +86-25-83272011; E-mail: li-ling76@hotmail.com

Professor Yu Liu, Department of Biochemistry, School of Life Science and Technology, China  
Pharmaceutical University, Nanjing 210009, China.

Tel: +86-25-83271543; Fax: +86-25-83271019; E-mail: liuyuyaoda@163.com

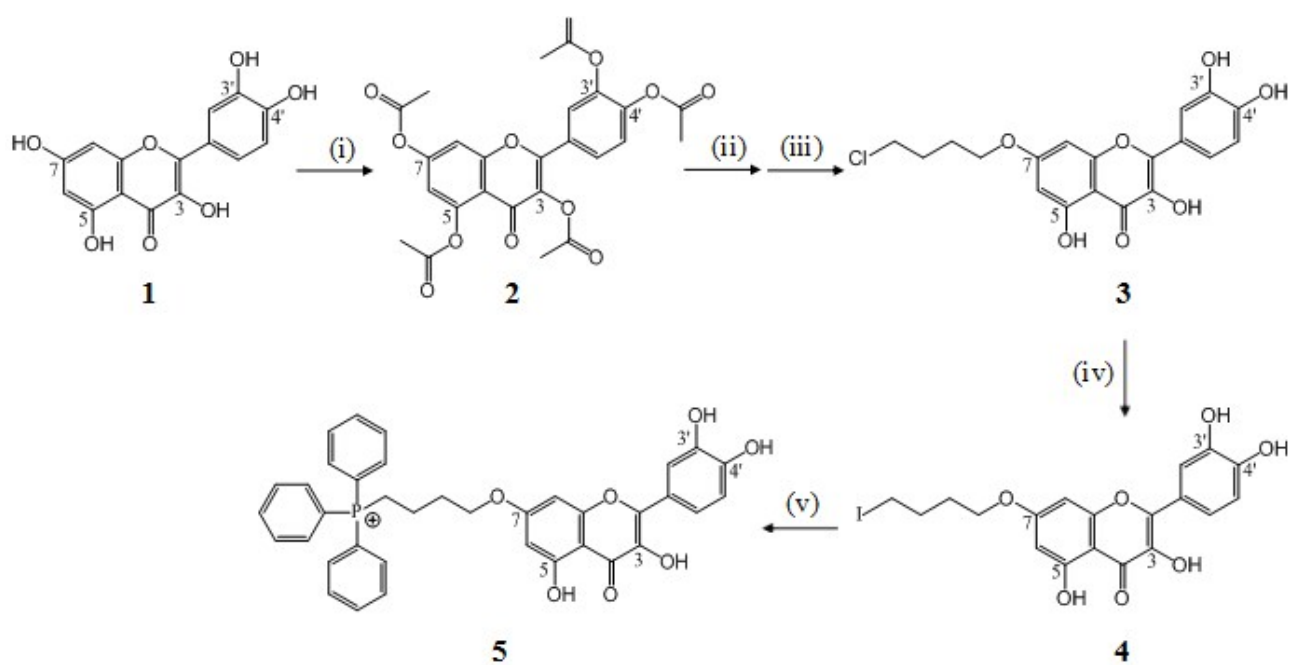

Figure S1. Synthesis route of TQ.

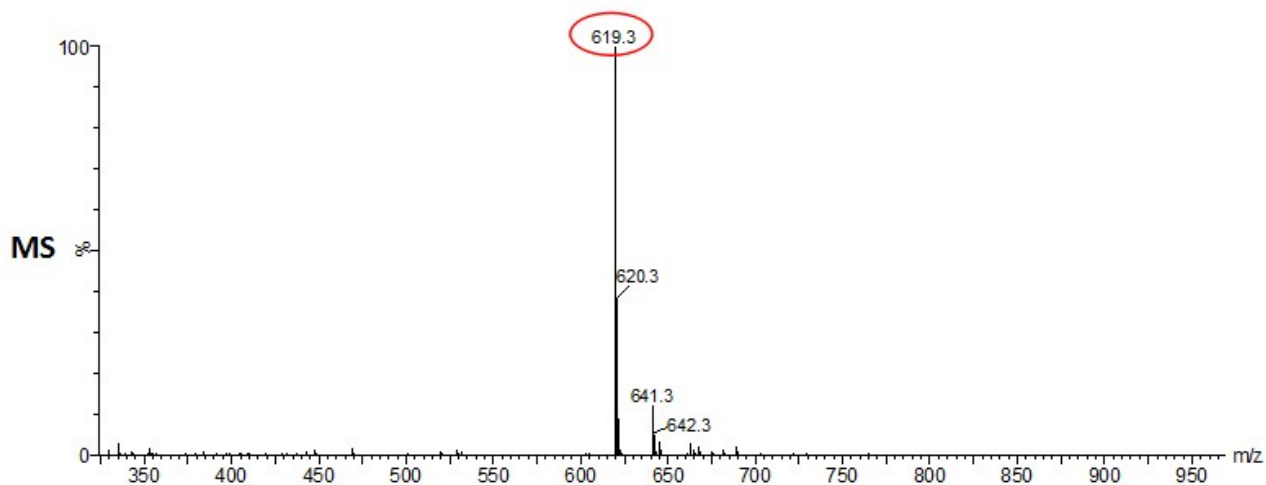

Figure S2. Mass spectrum analysis of TQ.

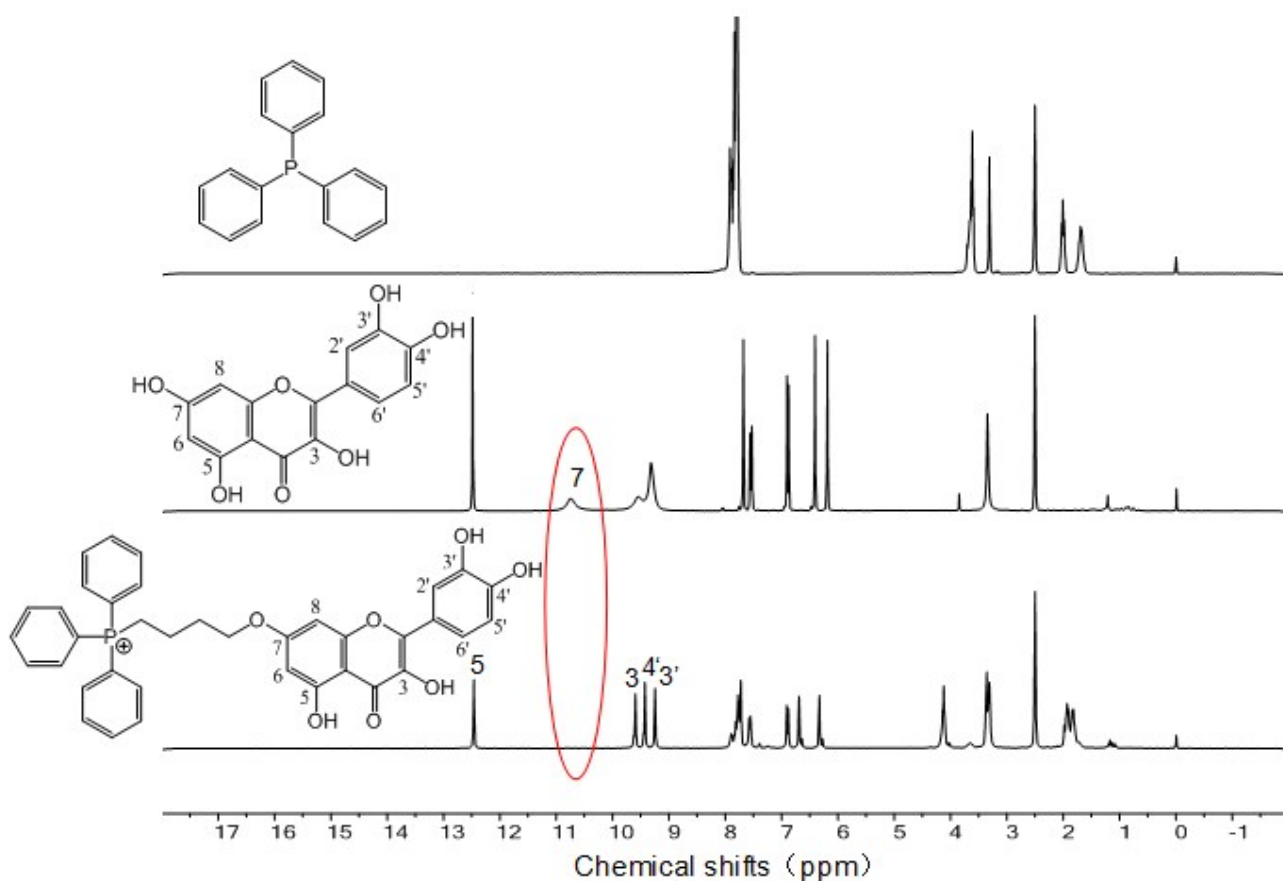

Figure S3.  $^1\text{H-NMR}$  spectra of TPP, Que and TQ dissolved in  $\text{DMSO-d}_6$ .  $^1\text{H-NMR}$  of TQ (300 MHz,  $\text{DMSO-d}_6$ ):  $\delta$  (ppm) = 1.58-2.13 (m, 4H,  $-\text{CH}_2 \times 2$ ), 3.96-4.32 (m, 4H,  $-\text{CH}_2 \times 2$ ), 6.35 (s, 1H, 6-H), 6.71 (s, 1H, 8-H), 6.91 (s, 1H, 5'-H), 7.49 (s, 1H, 6'-H), 7.63-7.96 (m, 16H, 15H =  $\text{PPh}_3$ , 1H = 2'-H).

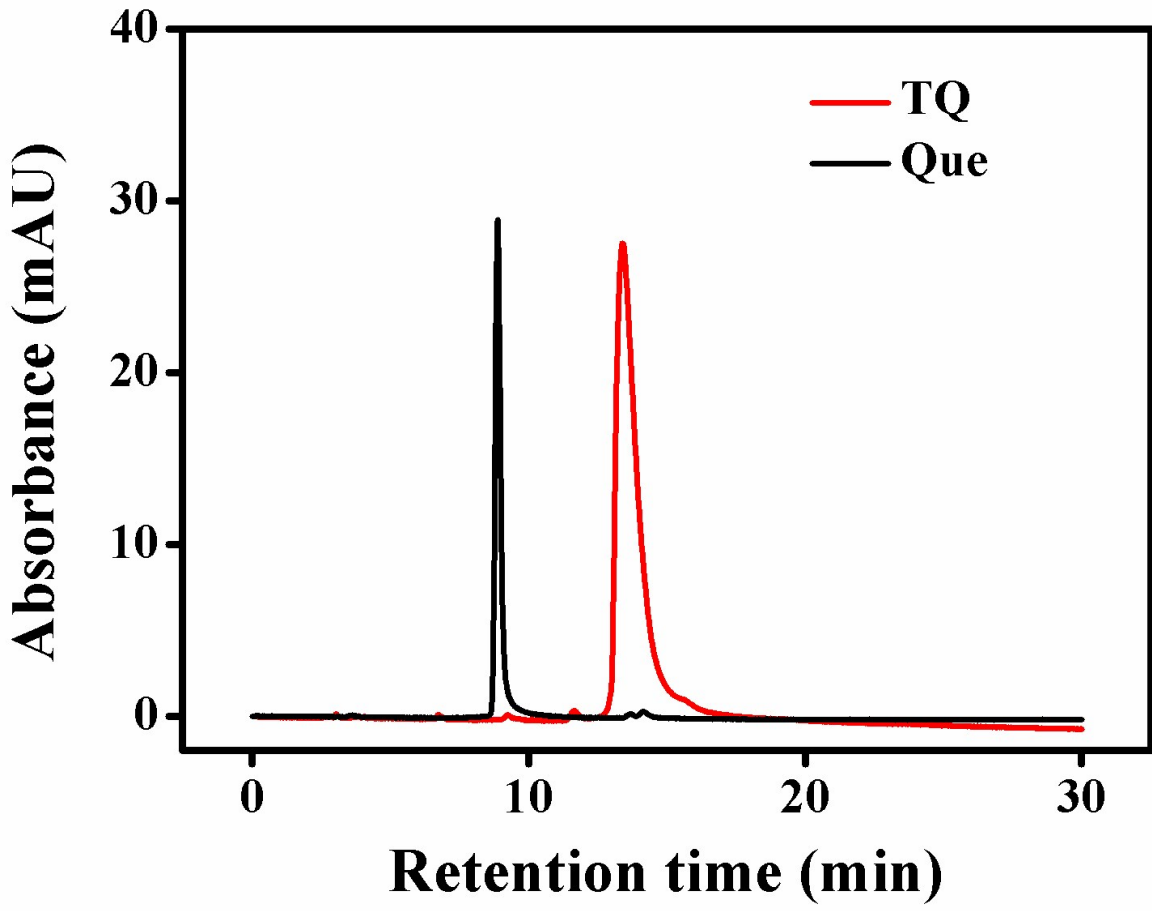

Figure S4. HPLC spectra of TQ and Que.

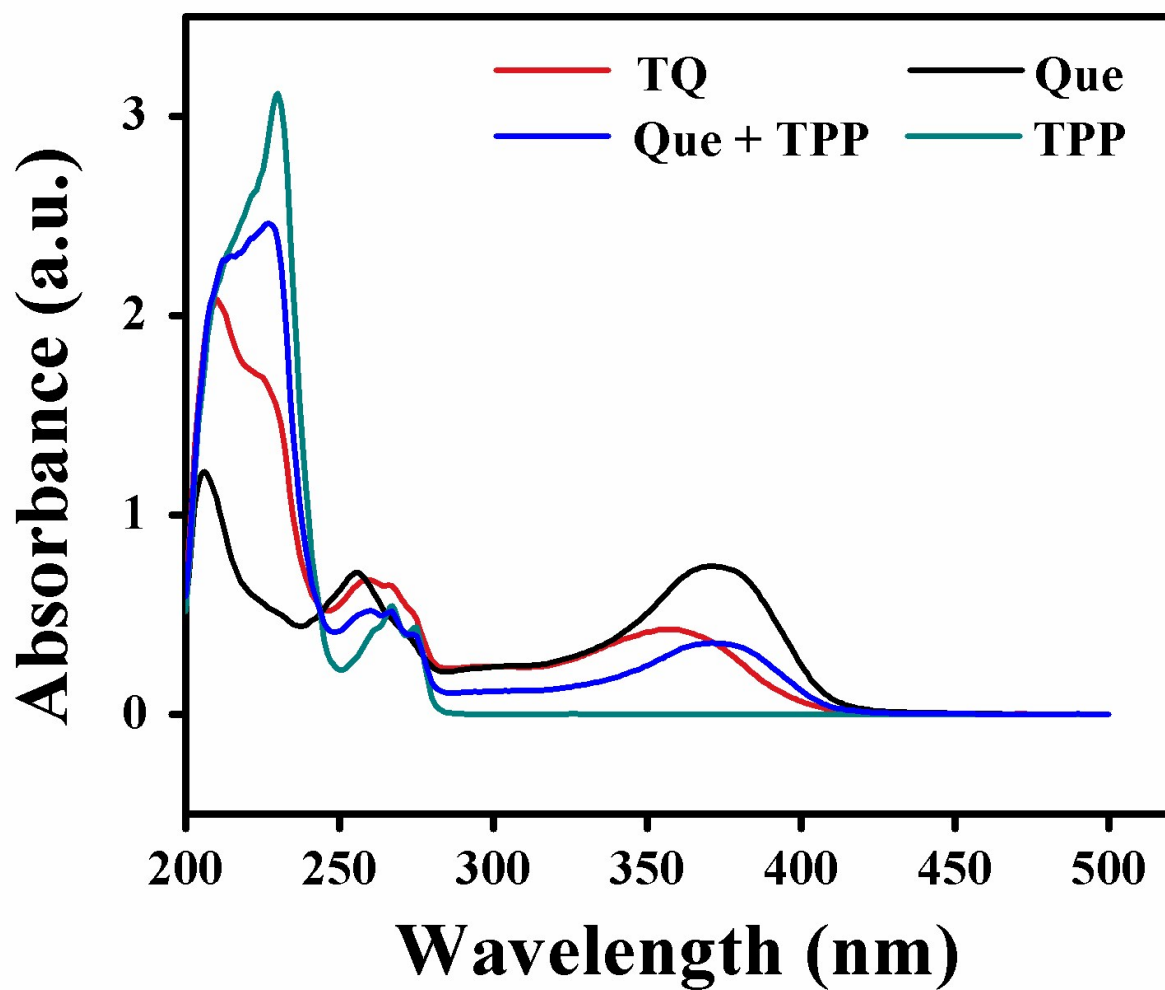

Figure S5. UV-Vis spectrum of Que, TPP, Que + TPP and TQ in DMSO.

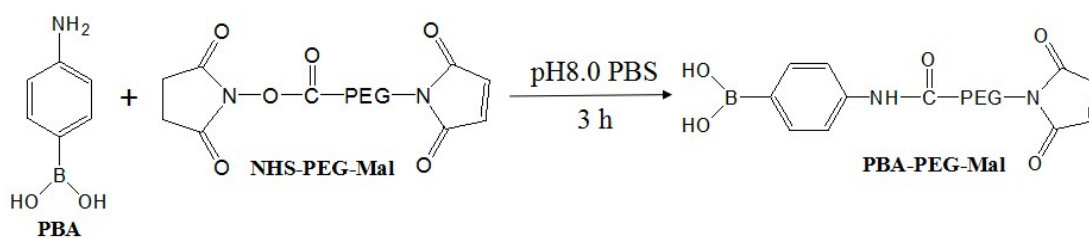

Figure S6. Synthesis route of PBA-PEG-Mal.

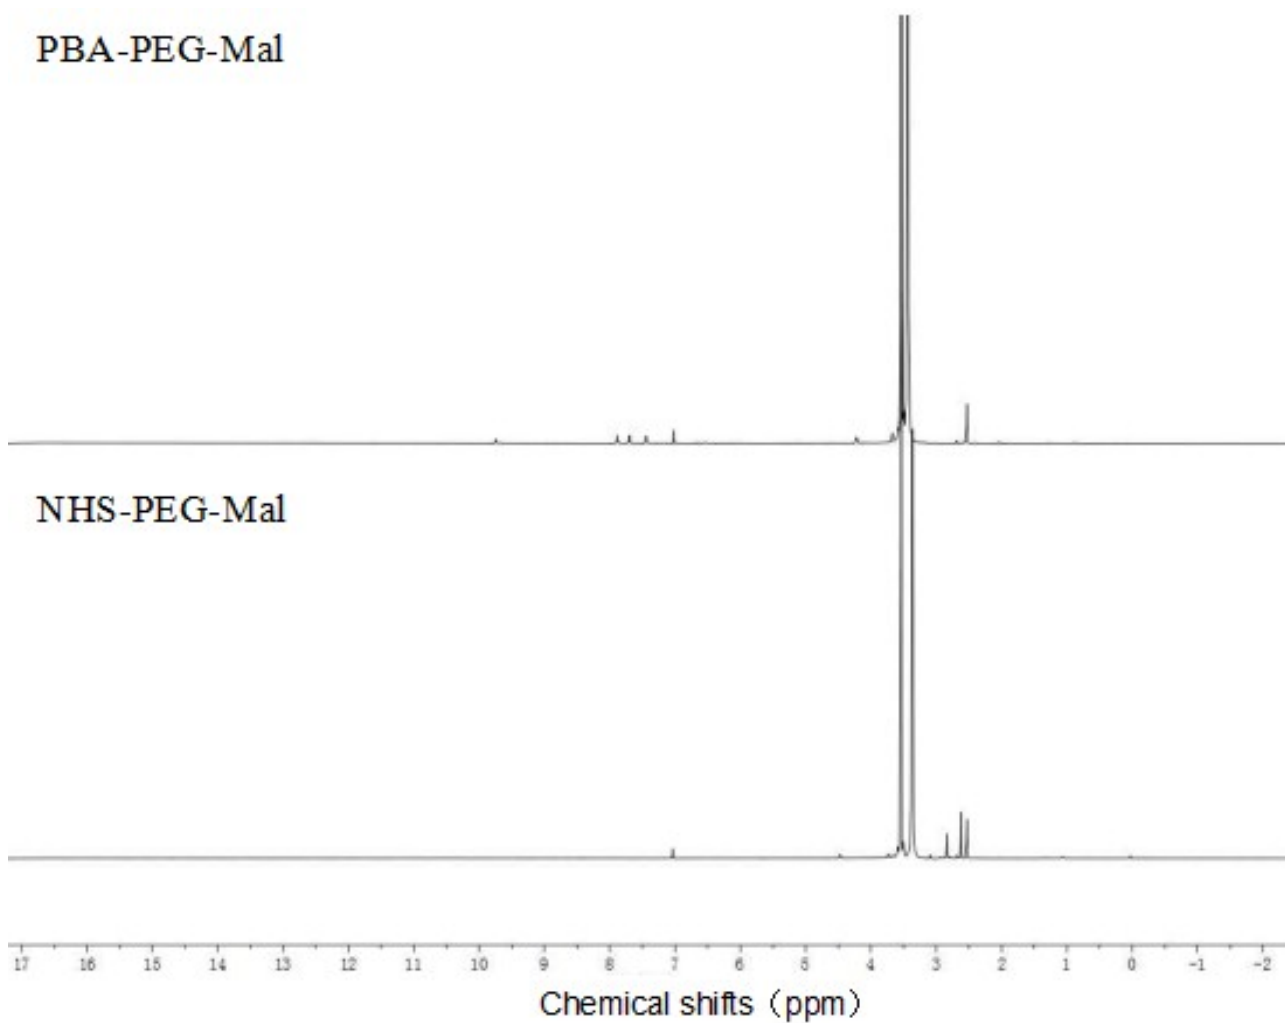

Figure S7. <sup>1</sup>H-NMR spectrum of PBA-PEG-Mal and NHS-PEG-Mal in DMSO-d<sub>6</sub>. <sup>1</sup>H-NMR spectrum of PBA-PEG-Mal (300 MHz, DMSO-d<sub>6</sub>):  $\delta$  (ppm) = 9.8 (s, -NH-),  $\delta$  (ppm) = 7.5-8.5 (m, 6H, -PhB(OH)<sub>2</sub>),  $\delta$  (ppm) = 6.9 (s, 2H, Mal),  $\delta$  (ppm) = 3.4-3.6 (m, 180H, -CH<sub>2</sub>CH<sub>2</sub>O-).

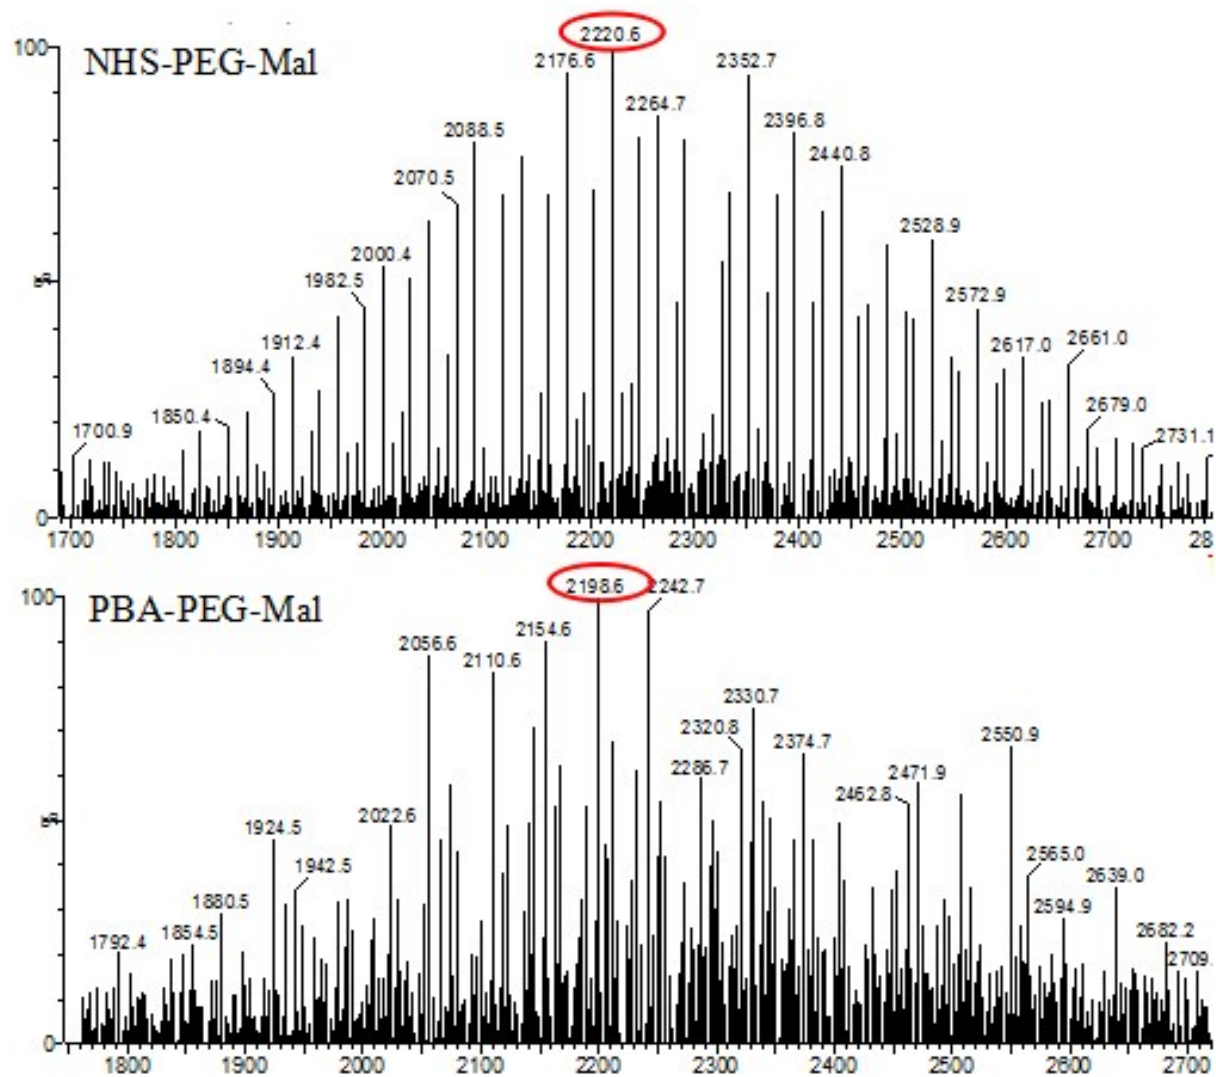

Figure S8. Mass spectrum analysis of PBA-PEG-Mal and NHS-PEG-Mal.

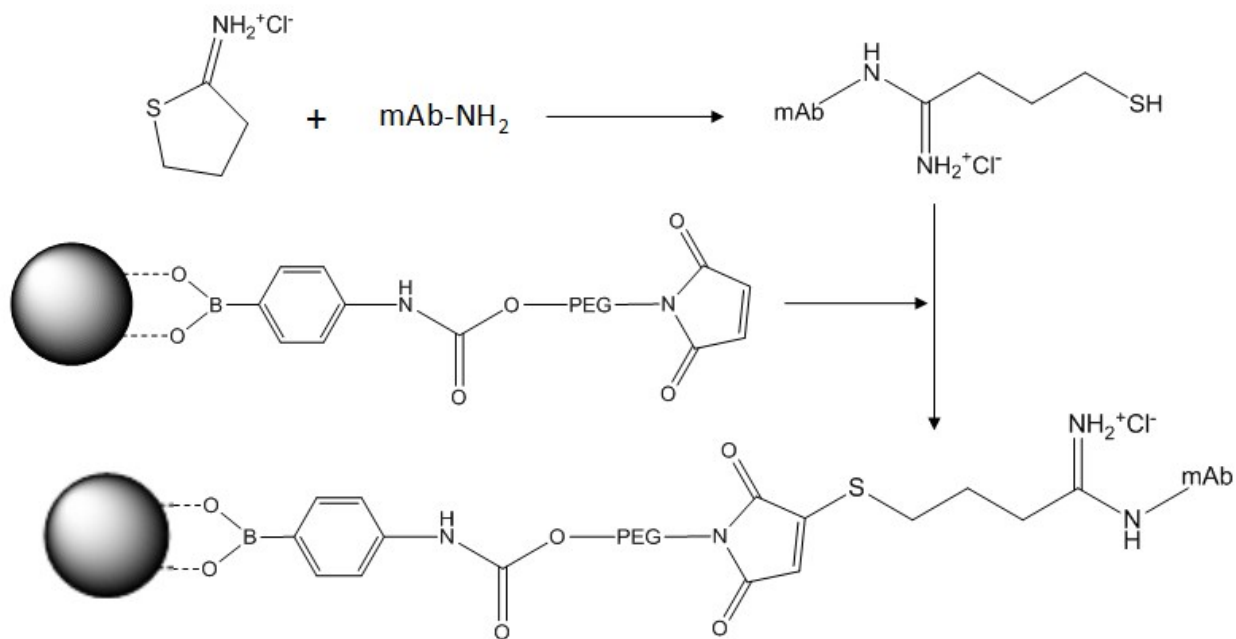

Figure S9. Synthesis scheme of anti-VEGF mAb conjugation to the surface of TQ/DOX-PEG.

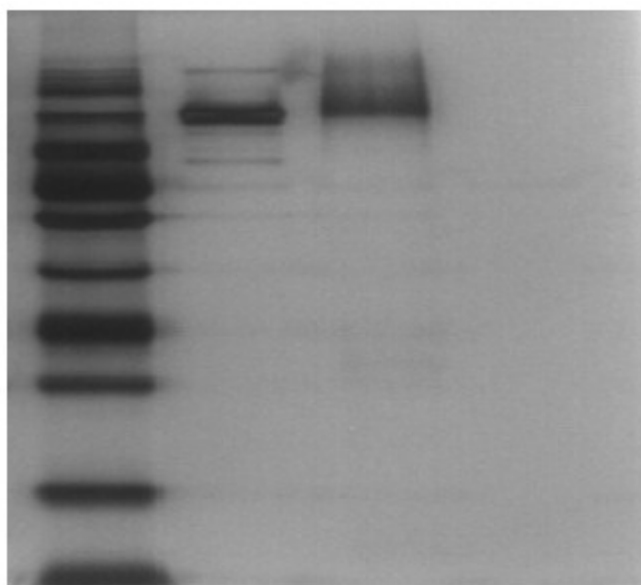

Figure S10. SDS-PAGE of anti-VEGF mAb, TQ/DOX-PEG-mAb and TQ/DOX-PEG (12%). Lane 1: protein marker; lane 2: anti-VEGF mAb; lane 3: TQ/DOX-PEG-mAb; lane 4: TQ/DOX-PEG.



a

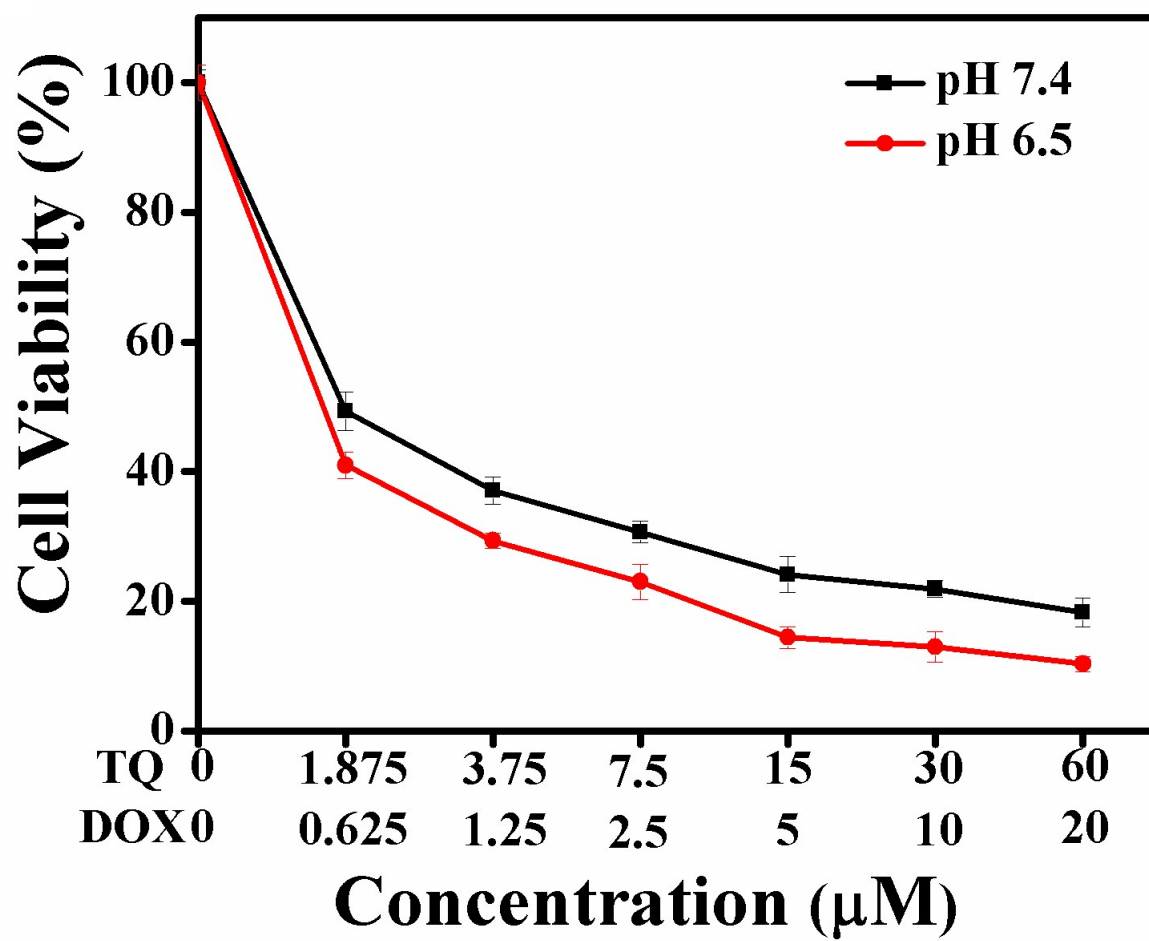

b

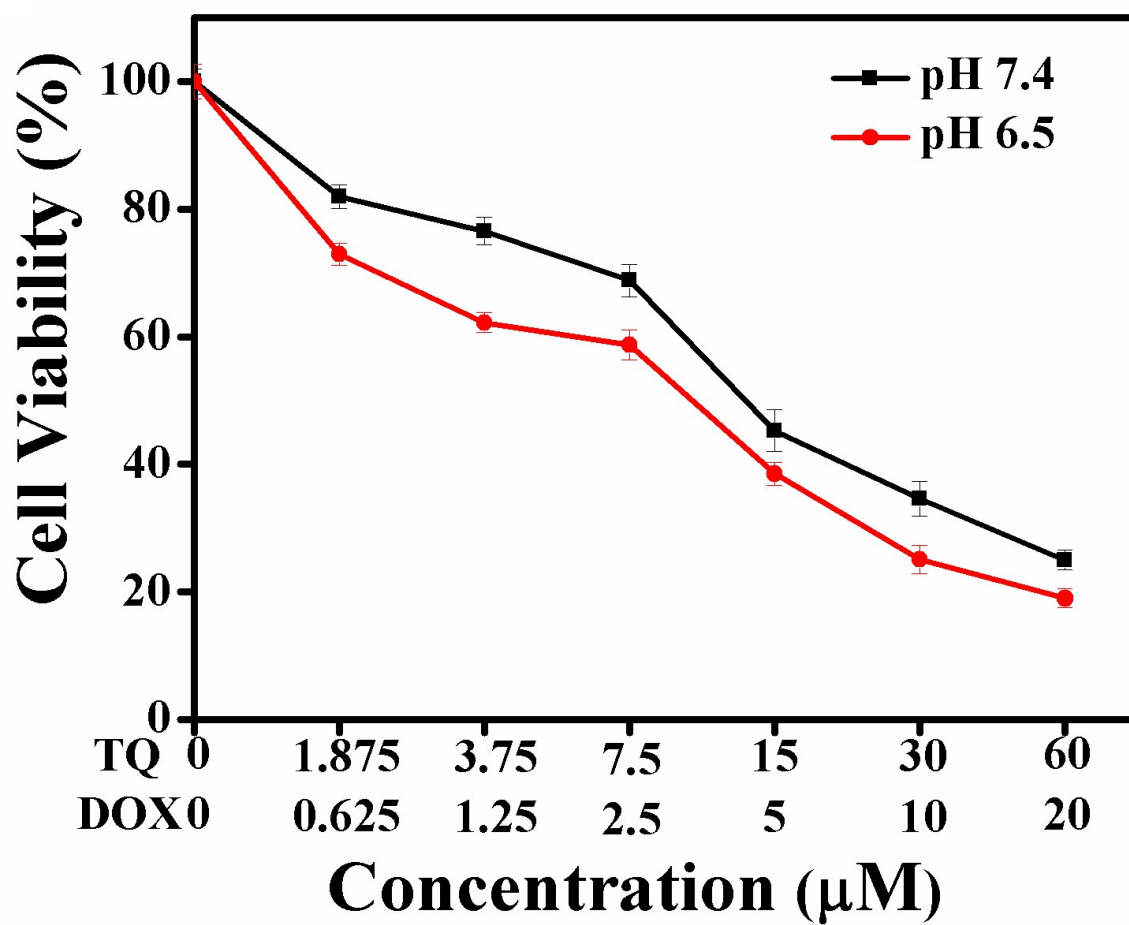

Figure S11. Cell viability of (a) MCF-7 cells and (b) MCF-7/ADR cells after 48h incubation TQ/DOX-PEG-mAb under pHs of 6.5 and 7.4.

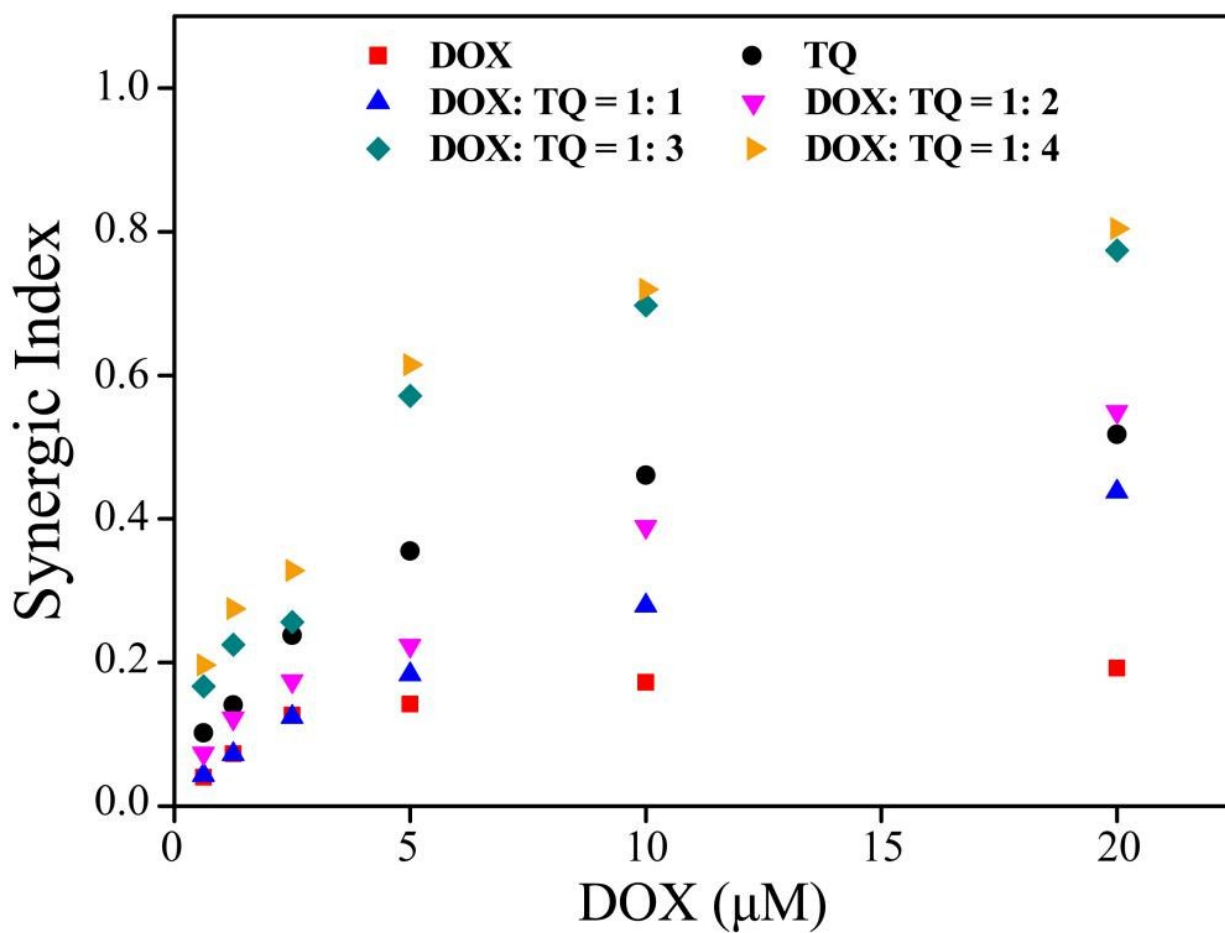

Figure S12. Synergic index (SI) of different molar ratios between TQ and DOX (1: 1, 2: 1, 3: 1 and 4: 1, respectively) was calculated by CompuSyn software. The concentration of DOX was at 0.625, 1.25, 2.5, 5, 10 and 20 μM, respectively.

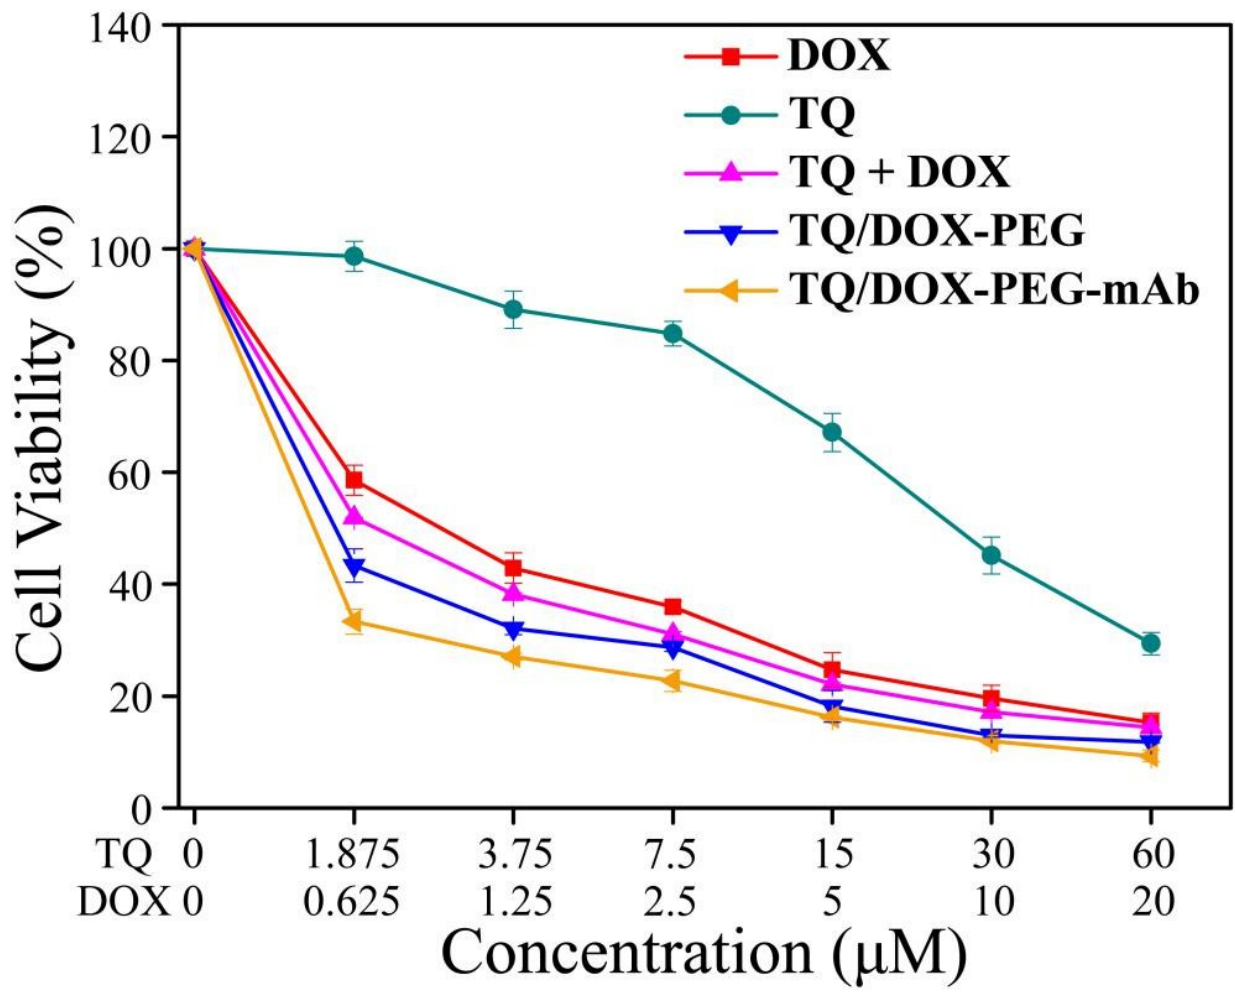

Figure S13. Cell viability of MDA-MB-231 cells after 48h incubation with DOX, TQ, TQ + DOX, TQ/DOX-PEG and TQ/DOX-PEG-mAb.

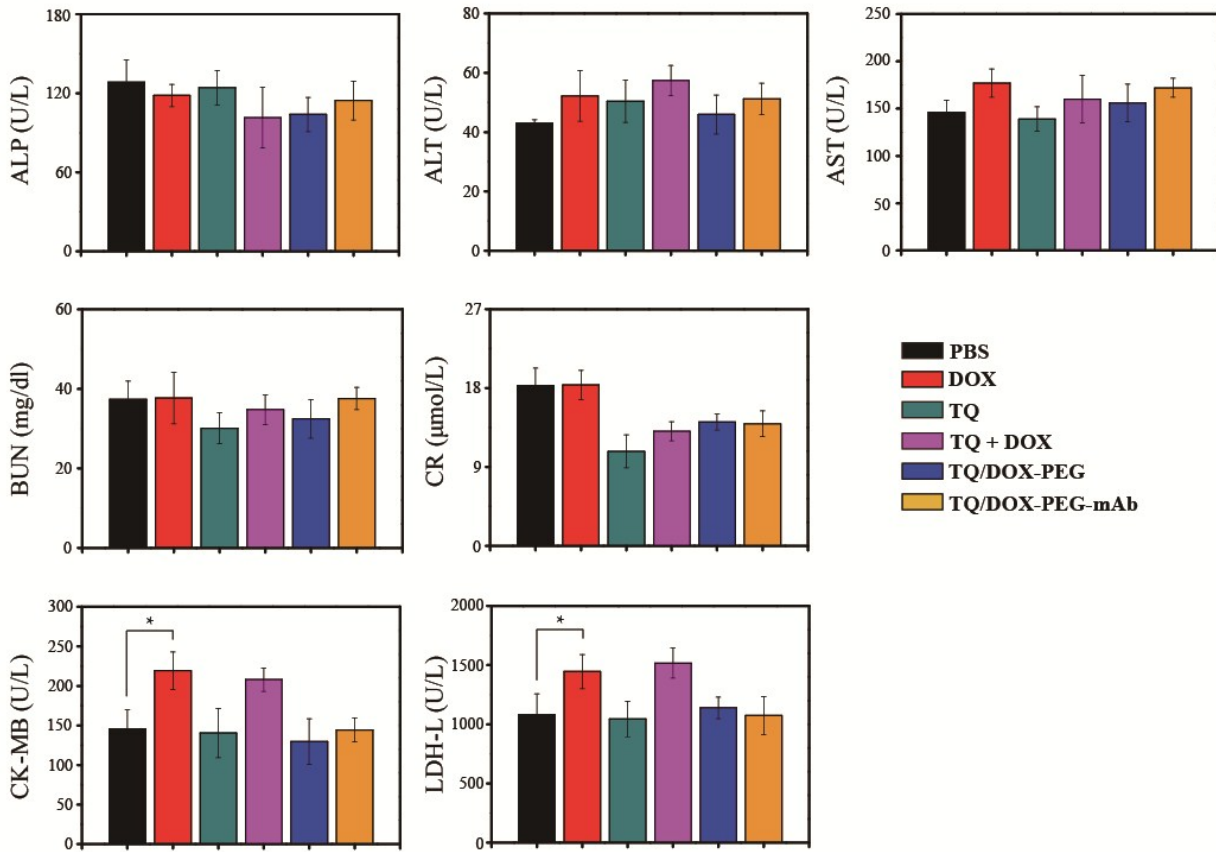

Figure S14. Blood biochemistry assessment of mice after treatment (n = 5), including liver function markers (ALP, ALT and AST), kidney function markers (BUN and CR) and heart function markers (CK-MB and LDH).

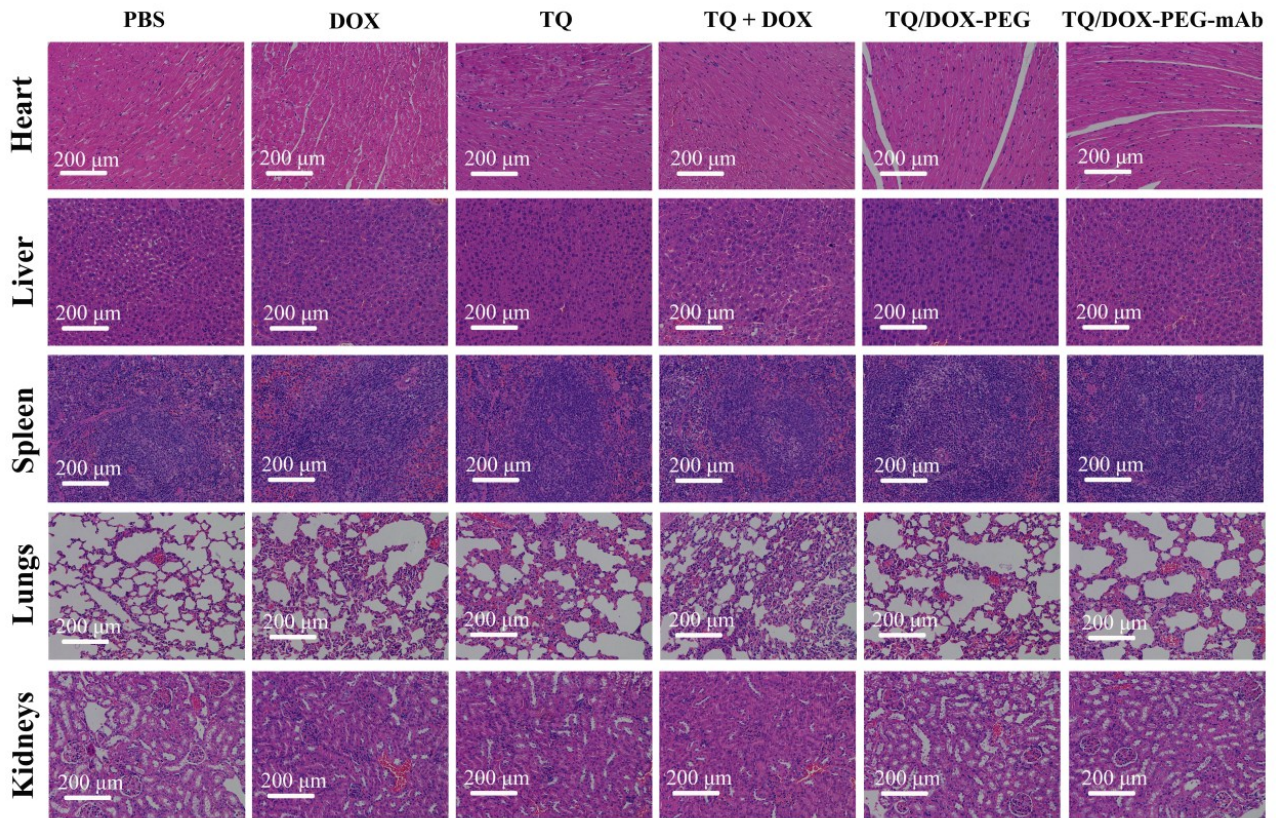

Figure S15. H&E staining of major organs after treatment with different groups (n = 5), scale bar = 200  $\mu\text{m}$ .

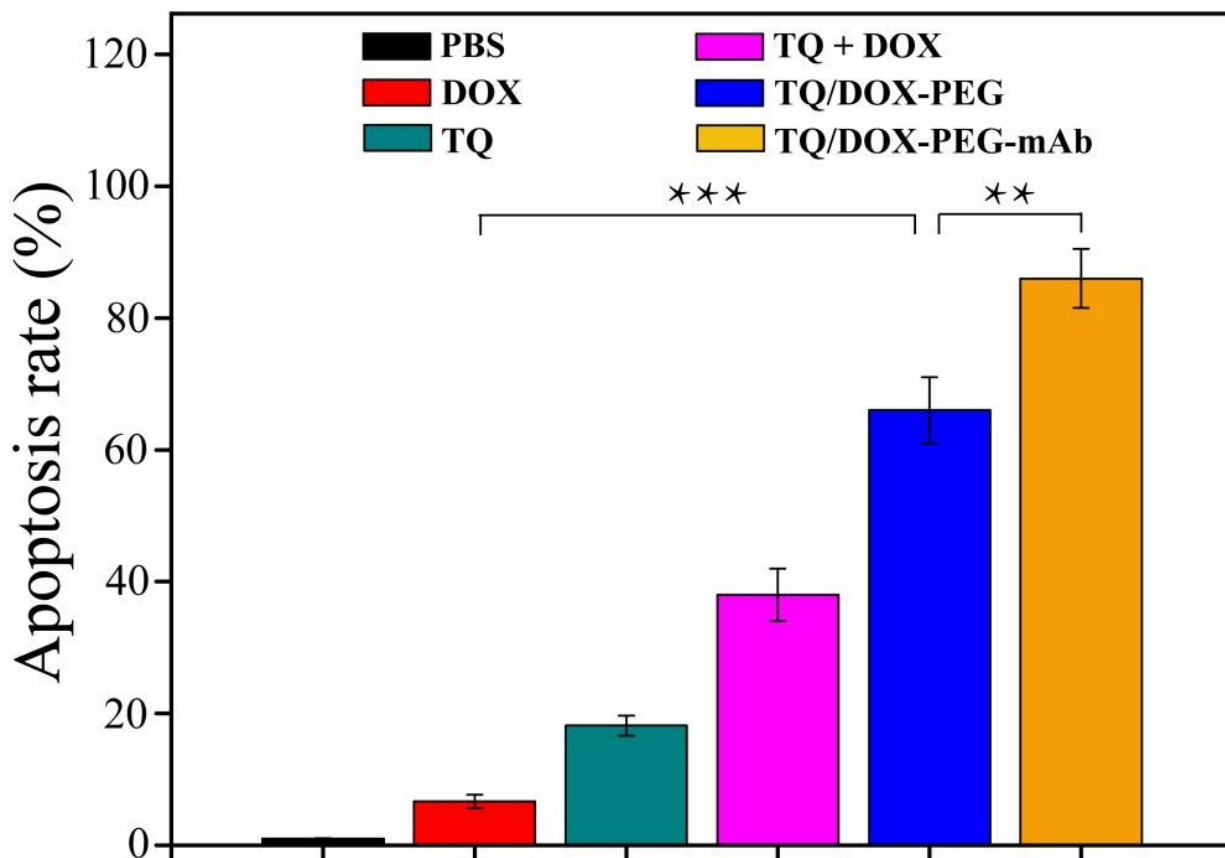

Figure S16. Quantitative analysis of TUNEL staining by ImageJ software. \*\*p < 0.01, \*\*\*p < 0.001 were measured by One-Way ANOVA.

Table S1. The characterization of TQ/DOX-PEG and TQ/DOX-PEG-mAb.

|                     | TQ/DOX-PEG    | TQ/DOX-PEG-mAb |
|---------------------|---------------|----------------|
| Particle size (nm)  | 89.3 ± 2.5    | 109.6 ± 3.3    |
| Zeta potential (mV) | 10.3 ± 0.4    | 1.5 ± 0.2      |
| PDI                 | 0.169 ± 0.024 | 0.182 ± 0.019  |

Table S2. The encapsulation efficiency of TQ and DOX in TQ/DOX-PEG-mAb.

|                              | TQ          | DOX         |
|------------------------------|-------------|-------------|
| Encapsulation efficiency (%) | 89.3 ± 0.23 | 94.7 ± 0.19 |

Table S3. The IC<sub>50</sub> of different formulations on MCF-7 and MCF-7/ADR cells.

|                | MCF-7         | MCF-7/ADR      |
|----------------|---------------|----------------|
| DOX            | 4.05 $\mu$ M  | 462.97 $\mu$ M |
| TQ             | 11.32 $\mu$ M | 20.14 $\mu$ M  |
| TQ + DOX       | 1.70 $\mu$ M  | 9.16 $\mu$ M   |
| TQ/DOX-PEG     | 0.77 $\mu$ M  | 5.47 $\mu$ M   |
| TQ/DOX-PEG-mAb | 0.084 $\mu$ M | 2.00 $\mu$ M   |
